# Supplementary material for: Divergent Effects of Peptidoglycan Carboxypeptidase DacA on Intrinsic β-Lactam and Vancomycin Resistance
Source: PubMed Central journal article supplement (PMC9430164; doi:10.1128/spectrum.01734-22), 2022-06-27
Supplement: spectrum.01734-22-s0001.pdf [file spectrum.01734-22-s0001.pdf]

## Supplementary materials

### 1. Supplementary Figures

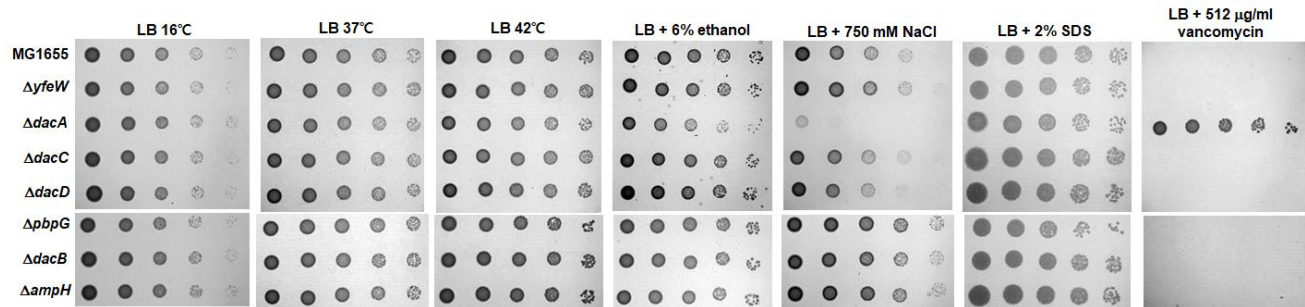

**FIG S1** Envelope stress-related phenotypes of PG carboxypeptidase-defective mutants. The wild-type and indicated mutant cells were serially diluted from  $10^8$  to  $10^4$  cells/ml in 10-fold steps and spotted onto LB plates or LB plates containing indicated compounds.

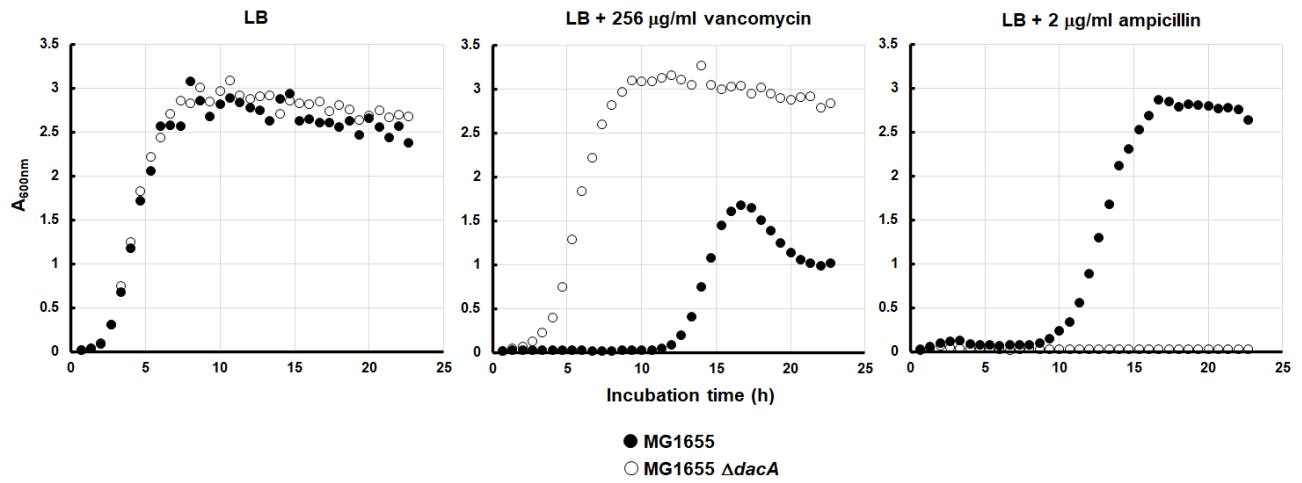

**FIG S2** The effect of vancomycin and ampicillin on the growth of the *dacA* mutant. The MG1655 or *dacA* mutant cells grown in LB overnight were inoculated in LB medium or LB medium with indicated concentrations of antibiotics. Cell growth was recorded by measuring the optical density at 600 nm: closed circles, MG1655; open circles, MG1655  $\Delta dacA$ .

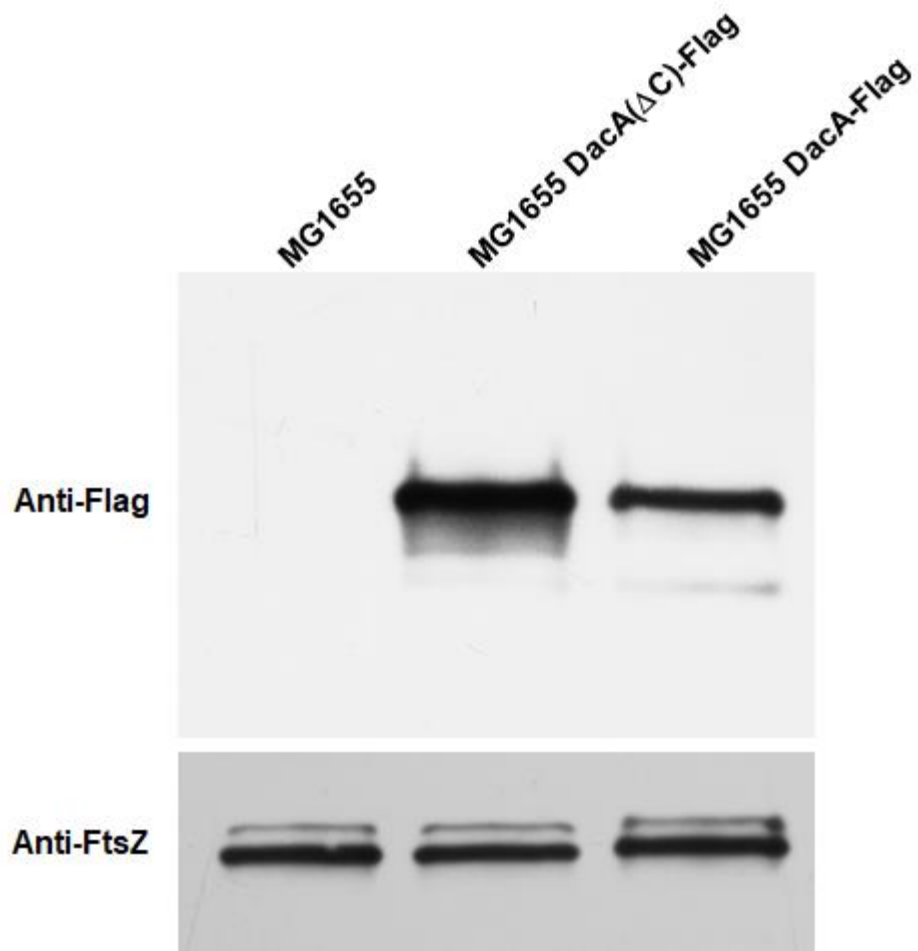

**FIG S3** Intracellular protein levels of DacA and DacA( $\Delta$ C). Western blot analysis with anti-Flag and anti-FtsZ antibodies was performed using  $5 \times 10^7$  cells of indicated strains grown in the LB to the early exponential phase ( $OD_{600nm} = 0.4$ ). FtsZ was used as the loading control.

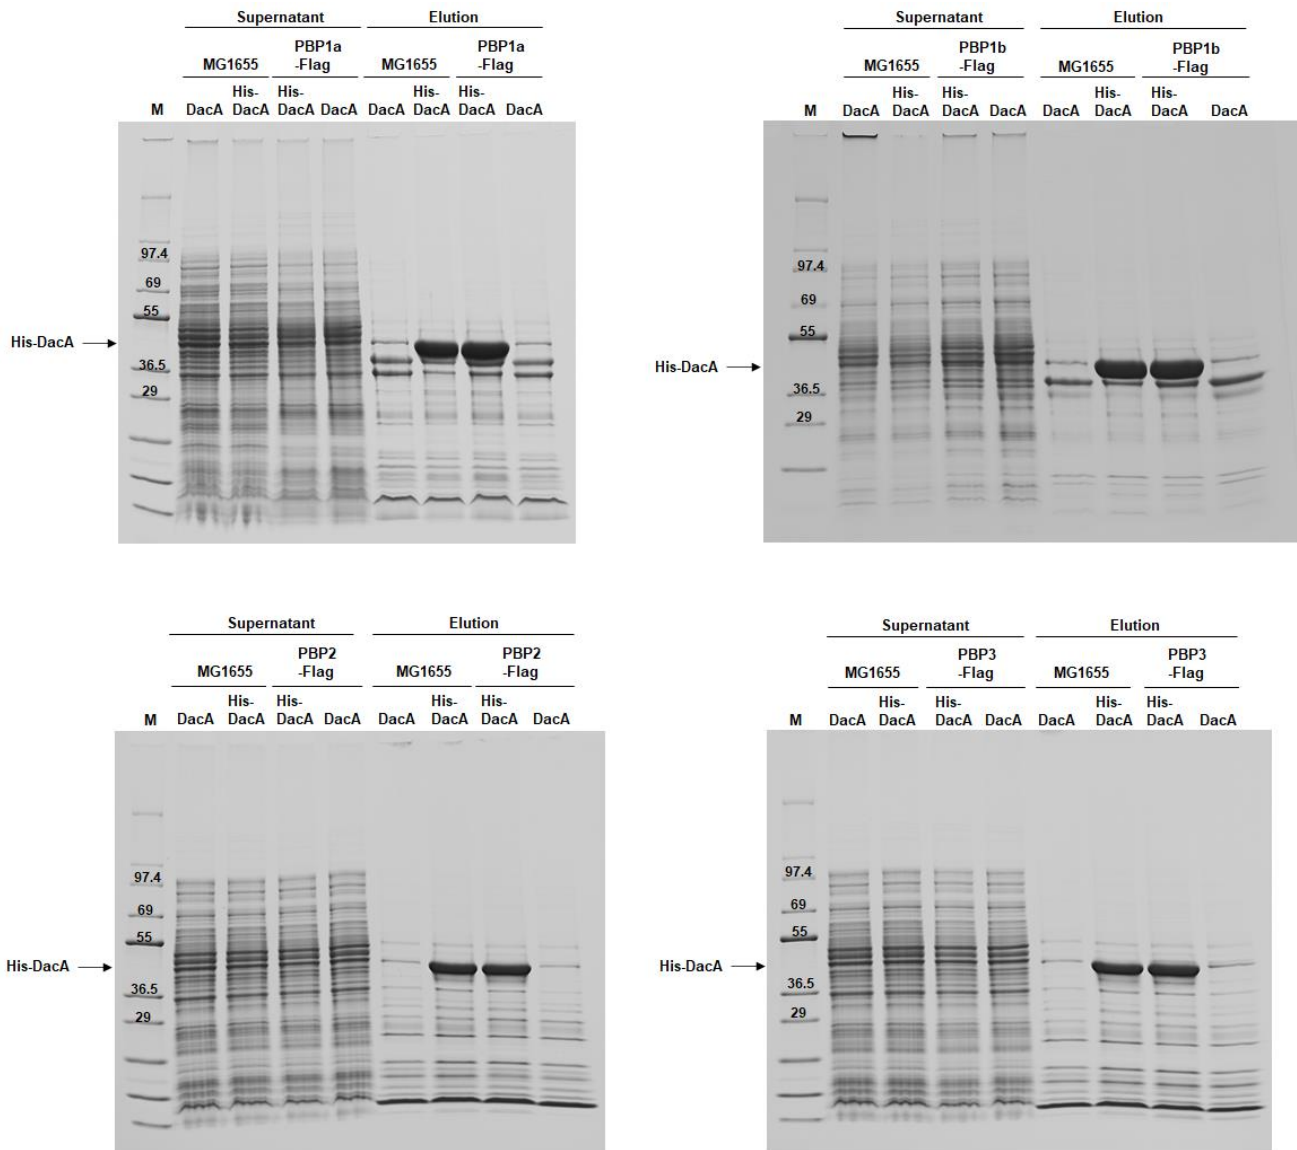

**Fig S4** SDS-PAGE gels of pull-down experiments using His-DacA. The supernatant of MG1655 cells or MG1655 cells with three Flag-tags fused to the C-terminus of the indicated chromosomal PBP was mixed with the supernatant of ER2566 cells harboring pET-based plasmid expressing His-tagged DacA or non-tagged DacA. After pull-down experiments, input (Supernatant) and output (Elution) samples were separated in 4–20% gradient Tris-glycine polyacrylamide gels (KOMA biotech, Korea) and stained with Coomassie brilliant blue. Lane M indicates EzWay™ Protein Blue MW Marker (KOMA Biotech., Korea).

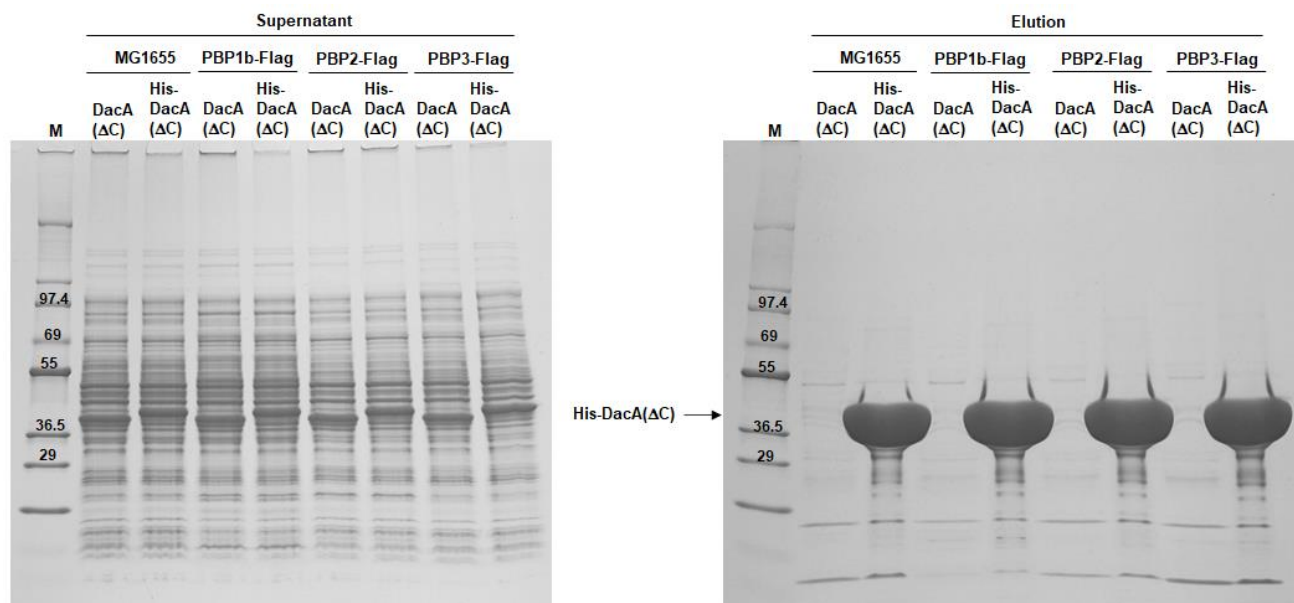

**Fig S5** SDS-PAGE gels of pull-down experiments using His-DacA( $\Delta$ C). The supernatant of MG1655 cells or MG1655 cells with three Flag-tags fused to the C-terminus of the indicated chromosomal PBP was mixed with the supernatant of ER2566 cells harboring pET-based plasmid expressing His-tagged DacA( $\Delta$ C) or non-tagged DacA( $\Delta$ C). After pull-down experiments, input (Supernatant) and output (Elution) samples were separated in 4–20% gradient Tris-glycine polyacrylamide gels (KOMA biotech, Korea) and stained with Coomassie brilliant blue. Lane M indicates EzWay<sup>TM</sup> Protein Blue MW Marker (KOMA Biotech., Korea).

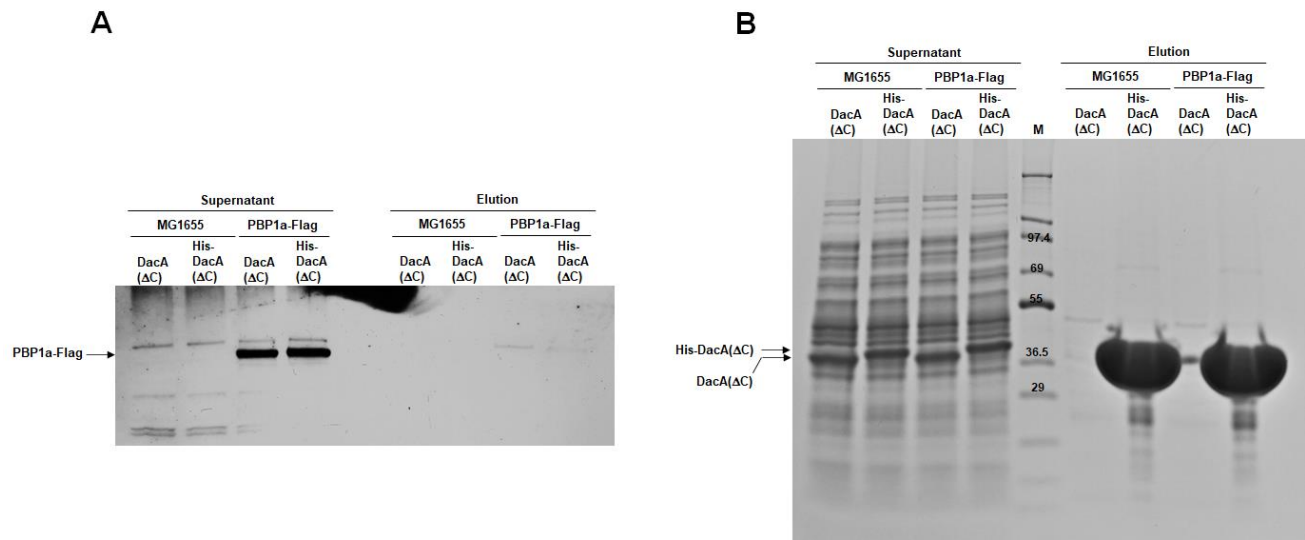

**Fig S6** The importance of the C-terminal domain of DacA for its interaction with PBP1a. (A) The supernatant of MG1655 cells or MG1655 cells with three Flag-tags fused to the C-terminus of the indicated chromosomal PBP1a was mixed with the supernatant of ER2566 cells harboring pET-based plasmid expressing His-tagged DacA(ΔC) or non-tagged DacA(ΔC). After pull-down experiments, the amount of input (Supernatant) and output (Elution) PBP1a was measured by western blot using monoclonal antibody against Flag-tag. (B) After pull-down experiments, input (Supernatant) and output (Elution) samples were separated in 4–20% gradient Tris-glycine polyacrylamide gels (KOMA biotech, Korea) and stained with Coomassie brilliant blue. Lane M indicates EzWay™ Protein Blue MW Marker (KOMA Biotech., Korea).

## 2. Supplementary Tables

**Supplementary Table S1. *Escherichia coli* and *Bacillus subtilis* strains and plasmids used in this study.**

| Strain or plasmid                                                                             | Genotype or phenotype                                                                                                     | Source or Reference             |
|-----------------------------------------------------------------------------------------------|---------------------------------------------------------------------------------------------------------------------------|---------------------------------|
| <b>Strains</b>                                                                                |                                                                                                                           |                                 |
| MG1655                                                                                        | F <sup>-</sup> $\lambda$ <i>ilvG</i> <i>rfb</i> -50 <i>rph</i> -1. Wild type <i>E. coli</i> K-12                          | (Blattner <i>et al.</i> , 1997) |
| <i>Bacillus subtilis</i>                                                                      |                                                                                                                           | (Ji <i>et al.</i> , 2018)       |
| MG1655 $\Delta$ <i>dacA</i>                                                                   | MG1655 <i>dacA</i> :: <i>frt</i>                                                                                          | This study                      |
| MG1655 $\Delta$ <i>dacB</i>                                                                   | MG1655 <i>dacB</i> :: <i>frt</i>                                                                                          | (Park <i>et al.</i> , 2020)     |
| MG1655 $\Delta$ <i>dacC</i>                                                                   | MG1655 <i>dacC</i> :: <i>frt</i>                                                                                          | This study                      |
| MG1655 $\Delta$ <i>dacD</i>                                                                   | MG1655 <i>dacD</i> :: <i>frt</i>                                                                                          | This study                      |
| MG1655 $\Delta$ <i>pbpG</i>                                                                   | MG1655 <i>pbpG</i> :: <i>frt</i>                                                                                          | (Park <i>et al.</i> , 2020)     |
| MG1655 $\Delta$ <i>ampH</i>                                                                   | MG1655 <i>ampH</i> :: <i>frt</i>                                                                                          | (Park <i>et al.</i> , 2020)     |
| MG1655 $\Delta$ <i>yfeW</i>                                                                   | MG1655 <i>yfeW</i> :: <i>frt</i>                                                                                          | This study                      |
| MG1655 $\Delta$ <i>dacA</i> $\Delta$ <i>dacD</i>                                              | MG1655 <i>dacA</i> :: <i>frt</i> <i>dacD</i> :: <i>Km<sup>r</sup></i>                                                     | This study                      |
| MG1655 $\Delta$ <i>dacA</i> $\Delta$ <i>dacD</i><br>$\Delta$ <i>ampH</i>                      | MG1655 <i>dacA</i> :: <i>frt</i> <i>dacD</i> :: <i>frt</i> <i>ampH</i> :: <i>Km<sup>r</sup></i>                           | This study                      |
| MG1655 $\Delta$ <i>dacA</i> $\Delta$ <i>dacD</i><br>$\Delta$ <i>ampH</i> $\Delta$ <i>dacB</i> | MG1655 <i>dacA</i> :: <i>frt</i> <i>dacD</i> :: <i>frt</i> <i>ampH</i> :: <i>frt</i> <i>dacB</i> :: <i>Km<sup>r</sup></i> | This study                      |
| MG1655 $\Delta$ <i>ldtABC</i>                                                                 | MG1655 <i>ldtA</i> :: <i>frt</i> <i>ldtB</i> :: <i>frt</i> <i>ldtC</i> :: <i>frt</i>                                      | This study                      |
| MG1655 $\Delta$ <i>ldtDE</i>                                                                  | MG1655 <i>ldtD</i> :: <i>frt</i> <i>ldtE</i> :: <i>frt</i>                                                                | This study                      |
| MG1655 $\Delta$ <i>lpp</i>                                                                    | MG1655 <i>lpp</i> :: <i>frt</i>                                                                                           | This study                      |
| MG1655 $\Delta$ <i>ldtDE</i> $\Delta$ <i>lpp</i>                                              | MG1655 <i>ldtD</i> :: <i>frt</i> <i>ldtE</i> :: <i>frt</i> <i>lpp</i> :: <i>frt</i>                                       | This study                      |

|                                                          |                                                                                                                                                                                                                    |                             |
|----------------------------------------------------------|--------------------------------------------------------------------------------------------------------------------------------------------------------------------------------------------------------------------|-----------------------------|
| MG1655 $\Delta dacA \Delta lpp$                          | MG1655 <i>dacA::frt lpp::frt</i>                                                                                                                                                                                   | This study                  |
| MG1655 $\Delta ompA \Delta ompC \Delta ompF$             | MG1655 <i>ompF::frt ompC::frt ompA::frt</i>                                                                                                                                                                        | (Choi and Lee, 2019)        |
| MG1655 $\Delta ompA \Delta ompC \Delta ompF \Delta dacA$ | MG1655 <i>ompF::frt ompC::frt ompA::frt dacA::frt</i>                                                                                                                                                              | This study                  |
| MG1655 DacA( $\Delta C$ )-Flag                           | MG1655 DacA(1-385)-3xFLAG                                                                                                                                                                                          | This study                  |
| MG1655 PBP1a-Flag                                        | MG1655 <i>mrcA</i> -3xFLAG, Cm <sup>R</sup>                                                                                                                                                                        | This study                  |
| MG1655 PBP1b-Flag                                        | MG1655 <i>mrcB</i> -3xFLAG, Cm <sup>R</sup>                                                                                                                                                                        | This study                  |
| MG1655 PBP2-Flag                                         | MG1655 <i>mrda</i> -3xFLAG, Cm <sup>R</sup>                                                                                                                                                                        | This study                  |
| MG1655 PBP3-Flag                                         | MG1655 <i>ftsI</i> -3xFLAG, Cm <sup>R</sup>                                                                                                                                                                        | This study                  |
| MG1655 DacA-Flag                                         | MG1655 <i>dacA</i> -3xFLAG, Cm <sup>R</sup>                                                                                                                                                                        | This study                  |
| <i>B. subtilis</i> $\Delta dacA$                         | <i>B. subtilis</i> $\Delta dacA$                                                                                                                                                                                   | This study                  |
| <i>B. subtilis</i> $\Delta dacB$                         | <i>B. subtilis</i> $\Delta dacB$                                                                                                                                                                                   | This study                  |
| <i>B. subtilis</i> $\Delta dacF$                         | <i>B. subtilis</i> $\Delta dacF$                                                                                                                                                                                   | This study                  |
| ER2566                                                   | F- $\lambda$ - <i>fhuA2</i> [ <i>lon</i> ] <i>ompT lacZ::T7 gene 1 gal sulA11</i><br>$\Delta(mcrC-mrr)114::IS10$ R( <i>mcr-73::miniTn10-TetS</i> )2<br>R( <i>zgb-210::Tn10</i> )(TetS) <i>endA1</i> [ <i>dcm</i> ] | New England Biolabs         |
| <b>Plasmids</b>                                          |                                                                                                                                                                                                                    |                             |
| pBAD24                                                   | Expression vector under control of arabinose-inducible promoter, Amp <sup>r</sup>                                                                                                                                  | Addgene                     |
| pBAD24(cm)                                               | pBAD24-based expression vector, Cm <sup>r</sup>                                                                                                                                                                    | (Park <i>et al.</i> , 2020) |
| pBAD-Flag                                                | pBAD24(cm)-based expression vector for the 3xFlag tag, Cm <sup>r</sup>                                                                                                                                             | (Park <i>et al.</i> , 2020) |



|                                     |                                                                                                                                |                             |
|-------------------------------------|--------------------------------------------------------------------------------------------------------------------------------|-----------------------------|
| pBAD-DacA                           | pBAD24(cm)-based expression vector for DacA, Cm <sup>r</sup>                                                                   | This study                  |
| pBAD-DacB                           | pBAD24(cm)-based expression vector for DacB, Cm <sup>r</sup>                                                                   | (Park <i>et al.</i> , 2020) |
| pBAD-DacC                           | pBAD24(cm)-based expression vector for DacC, Cm <sup>r</sup>                                                                   | This study                  |
| pBAD-DacD                           | pBAD24(cm)-based expression vector for DacD, Cm <sup>r</sup>                                                                   | This study                  |
| pBAD-YfeW                           | pBAD24(cm)-based expression vector for YfeW, Cm <sup>r</sup>                                                                   | This study                  |
| pBAD-PbpG                           | pBAD24(cm)-based expression vector for PbpG, Cm <sup>r</sup>                                                                   | (Park <i>et al.</i> , 2020) |
| pBAD-AmpH                           | pBAD24(cm)-based expression vector for AmpH, Cm <sup>r</sup>                                                                   | (Park <i>et al.</i> , 2020) |
| pBAD-PBP1a-Flag                     | pBAD24(cm)-based expression vector for PBP1a fused with the 3xFlag tag at the C-terminus, Cm <sup>r</sup>                      | This study                  |
| pBAD-PBP1b-Flag                     | pBAD24(cm)-based expression vector for PBP1b fused with the 3xFlag tag at the C-terminus, Cm <sup>r</sup>                      | This study                  |
| pBAD-PBP2-Flag                      | pBAD24(cm)-based expression vector for PBP2 fused with the 3xFlag tag at the C-terminus, Cm <sup>r</sup>                       | This study                  |
| pBAD-PBP3-Flag                      | pBAD24(cm)-based expression vector for PBP3 fused with the 3xFlag tag at the C-terminus, Cm <sup>r</sup>                       | This study                  |
| pBAD-Flag-FRT-Kan                   | pBAD24(cm)-based expression vector containing the 3xFlag tag, FRT-Km <sup>r</sup> , Cm <sup>r</sup>                            | This study                  |
| pBAD-DacA( $\Delta$ C)-Flag-FRT-Kan | pBAD24(cm)-based expression vector for DacA(1-385) fused with the 3xFlag tag C-terminus, FRT-Km <sup>r</sup> , Cm <sup>r</sup> | This study                  |
| pKD13                               | Template plasmid for the amplification of the kanamycin-resistance gene bordered by FRT sites, Km <sup>r</sup>                 | (Datsenko and Wanner, 2000) |
| pKD46                               | $\lambda$ Red recombinase expression plasmid Ts replicon, Amp <sup>r</sup>                                                     | (Datsenko and Wanner, 2000) |
| pCP20                               | FLP helper plasmid Ts replicon, Amp <sup>r</sup> , Cm <sup>r</sup>                                                             | (Datsenko and Wanner, 2000) |

|                          |                                                                                               |                              |
|--------------------------|-----------------------------------------------------------------------------------------------|------------------------------|
| pET28a                   | Expression vector under control of T7 promoter, Km <sup>r</sup>                               | Novagen                      |
| pET24a                   | Expression vector under control of T7 promoter, Km <sup>r</sup>                               | Novagen                      |
| pET24a-DacA              | pET24a-based expression vector for DacA(30-403), Km <sup>r</sup>                              | This study                   |
| pET24a-DacA( $\Delta$ C) | pET24a-based expression vector for DacA(30-385), Km <sup>r</sup>                              | This study                   |
| pET24a-PBP1a             | pET24a-based expression vector for PBP1a, Km <sup>r</sup>                                     | This study                   |
| pET24a-PBP1b             | pET24a-based expression vector for PBP1b, Km <sup>r</sup>                                     | This study                   |
| pET28a-DacA              | pET28a-based expression vector for DacA(30-403) with N-terminal 6 histidines, Km <sup>r</sup> | This study                   |
| pET28a-DacA( $\Delta$ C) | pET28a-based expression vector for DacA(30-385) with N-terminal 6 histidines, Km <sup>r</sup> | This study                   |
| pET28a-NDM-1             | pET28a-based expression vector for NDM-1 with N-terminal 6 histidines, Km <sup>r</sup>        | This study                   |
| pRE1                     | Expression vector under control of promoter, Amp <sup>r</sup>                                 | (Reddy <i>et al.</i> , 1989) |
| pRE1(kan)                | Expression vector under control of promoter, Km <sup>r</sup>                                  | This study                   |
| pRE1-DacA                | pRE1-based expression vector for DacA, Km <sup>r</sup>                                        | This study                   |
| pRE1-DacA( $\Delta$ C)   | pRE1-based expression vector for DacA(1-385), Km <sup>r</sup>                                 | This study                   |
| pRE1-DacA(S73G)          | pRE1-based expression vector for DacA(S73G), Km <sup>r</sup>                                  | This study                   |
| pRE1-DacA(K242R)         | pRE1-based expression vector for DacA(K242R), Km <sup>r</sup>                                 | This study                   |

**Supplementary Table S2. Oligonucleotides used in this study**

| Name       | Oligonucleotide sequence (5'–3')                                               | Use(s)   |
|------------|--------------------------------------------------------------------------------|----------|
| DacA-FRT-F | CTATAGTAGGGCACTTTTTTAATTCCATCACG<br>GATGTCGTAGTTCAGACCGTGTAGGCTGGAG<br>CTGCTTC |          |
| DacA-FRT-R | GGGTAAACGGTTTCAAAGAAACGGAAGCCCC<br>AGGTTAGCAGTTTTTTACTATTCCGGGGATCC<br>GTCGACC |          |
| DacC-FRT-F | CATACGGCGATATAACGTATTTTTTTTGAATG<br>GATACTCGGGTGGCATTGTGTAGGCTGGAG<br>CTGCTTC  |          |
| DacC-FRT-R | AAGGTGGCATCAGGTTTAATTGGCGTCACGG<br>TTCAAAGAAGCGGAAACCATTCCGGGGATC<br>CGTCGACC  |          |
| DacD-FRT-F | AAGTATTTCCGTAAAAAGAACAGCTATTTGA<br>AACTCCTGAGGGTTTGCTGGTGTAGGCTGGA<br>GCTGCTTC |          |
| DacD-FRT-R | TCCGTTCCGACCTTTTTCCCACGGTGCAAAAT<br>TTGCACCGTAGTAAAGTTATTCCGGGGATCCG<br>TCGACC | Deletion |
| YfeW-FRT-F | AACCAGATGGATCGCTGGATTAGCCAGCAAG<br>TTGATGTCGGTTATCCCAGGTGTAGGCTGGAG<br>CTGCTTC |          |
| YfeW-FRT-R | CATTACCATTCACGCGCCAGCCGAGGCCAAA<br>AGTGGCATCTTCCTTAGAGATTCCGGGGATCC<br>GTCGACC |          |
| LdtA-FRT-F | ATAAAAGCTATACTTAACGGATAGCTTTCGCG<br>ACATAGGAAAGGGACATGGTGTAGGCTGGAG<br>CTGCTTC |          |
| LdtA-FRT-R | TTAAAACATCTGTCTTGAACCAGAACTAATTT<br>GCACAGGCATTCCCGATCATTCCGGGGATCC<br>GTCGACC |          |
| LdtB-FRT-F | CTCTAATATTCTCAACCCAATGGCCTGCCAGG<br>CACAAAATCTCGCTTAACGTGTAGGCTGGAG<br>CTGCTTC |          |

|            |                                                                                 |
|------------|---------------------------------------------------------------------------------|
| LdtB-FRT-R | CAAAC TGGGCTTCGGTGGTAGACAGCGGGTT<br>ATGGACTTCAATATAACGGATTCCGGGGATC<br>CGTCGACC |
| LdtC-FRT-F | TCAGGCTTATCTGTTTATTACAATAACCTTAT<br>ATTTATTATGGATTTTTGGTGTAGGCTGGAGC<br>TGCTTC  |
| LdtC-FRT-R | TGCATCACTTCAGCGTCAGTTTGTGCTGCATC<br>TTTAAATGATTGCATTGCATTCCGGGGATCCG<br>TCGACC  |
| LdtD-FRT-F | TAAAATAACAGCCTGGCTATTCAGAGTATGA<br>TAAAAACAGGGGGCAAGGGGTGTAGGCTGGA<br>GCTGCTTC  |
| LdtD-FRT-R | CCCCAATCATGCTAATTATTACGACAACTGAT<br>TTCCCCGAAC TACTTCATATTCGGGGATCCG<br>TCGACC  |
| LdtE-FRT-F | CGCCATCCGACGTTTCAGCGTGAGTCTCCGGC<br>AAATACAGGAGGTTTACAGTGTAGGCTGGAG<br>CTGCTTC  |
| LdtE-FRT-R | CCTGCCCCGACGATACAACGCTTTATCGACTAA<br>CTTCTGATCTACAGCCTTATTCGGGGATCCG<br>TCGACC  |
| Lpp-FRT-F  | AATACTTGTAACGCTACATGGAGATTA ACTCA<br>ATCTAGAGGGTATTAATAGTGTAGGCTGGAG<br>CTGCTTC |
| Lpp-FRT-R  | ACAAAAAAAATGGCGCACAATGTGCGCCATT<br>TTTCACTTACAGGTAATAATTCCGGGGATCC<br>GTCGACC   |

---

|            |                                  |
|------------|----------------------------------|
| DacA-cfm-F | AAAGTCAGATGCCTGCCGGTAGTGCATTTG   |
| DacA-cfm-R | TCAGAGGGCGAACTCTTTACCTACTTTTCAGT |
| DacC-cfm-F | TGTGTGTGCGTTATTAATCACCAA ACTTAT  |
| DacC-cfm-R | CGCTCTTATCACCAAACCAGACGCGCTGAG   |
| DacD-cfm-F | TTTTCTTGCACTTTATTCAGCCAGTTCAT    |
| DacD-cfm-R | ATATTTTCTTTATCGCCATACCAGATGCGT   |

Deletion  
confirm

|            |                                 |
|------------|---------------------------------|
| YfeW-cfm-F | GAGAAAGCAGGGTTTAAACGTCGAACGGCTT |
| YfeW-cfm-R | CCAGCGTGCCAAACGTCGGCGTCATGGTGG  |
| LdtA-cfm-F | TGATTTGAACAGTTAAAAACGAAAAGTCTG  |
| LdtA-cfm-R | AGGCTTTTTGCTTTCTAATTACCAACGCTC  |
| LdtB-cfm-F | CTGGAATGAACTTATAATGCGCTTCCAATA  |
| LdtB-cfm-R | TCAGGGTAATTGGCACAATTTCTGACCTT   |
| LdtC-cfm-F | GCACTATCCGACACTGTCACCATCCATAAT  |
| LdtC-cfm-R | GGCATCCCGGAACGGACATCCATCACATGT  |
| LdtD-cfm-F | CGTGAGTATTGGCGTTGTACAGGCAAGTCG  |
| LdtD-cfm-R | CCAGCAGTGACGGGGGCTGCAGAGAATCGC  |
| LdtE-cfm-F | AGGAGTGTTTTGGTTTCAGGTGAACATAAG  |
| LdtE-cfm-R | GTTGCTCCACTGCTCACCGAAACCGGATAC  |
| Lpp-cfm-F  | GAGCGAACGATCAAAAATAAGTGCCTTCCC  |
| Lpp-cfm-R  | CAAGGGAATATGTTACGCGTGACGCAGTAG  |

---

|                |                                                                                 |
|----------------|---------------------------------------------------------------------------------|
| PBP1a-3×Flag-F | ACGAGGTGGGAACGACCATTATCGATAATGG<br>CGAGGCACAGGAATTGTTTCGTCGACCTGCAG<br>GATTATAA |
| PBP1a-3×Flag-R | ACAAGTGCACTTTGTCAGCAAACCTGAAAAGG<br>CGCCGAAGCGCCTTTTTAATTACGCCCGCCC<br>TGCCACT  |
| PBP1b-3×Flag-F | AAGACAGCGACGGTGTAGCCGGTTGGATCAA<br>GGATATGTTTGGTAGTAATGTCGACCTGCAGG<br>ATTATAA  |
| PBP1b-3×Flag-R | TGTTATTTTACCGGATGGCAAACCTCGCCATCCG<br>GTATTTACGCTTAGATGTTACGCCCGCCCT<br>GCCACT  |

Chromosomal  
3×Flag tag

|                               |                                                                                 |                                      |
|-------------------------------|---------------------------------------------------------------------------------|--------------------------------------|
| PBP2-3×Flag-F                 | ACACCGATCTGCCTGCGGAAAATCCAGCGGT<br>TGCCGCAGCGGAGGACCATGTTCGACCTGCAG<br>GATTATAA |                                      |
| PBP2-3×Flag-R                 | GAGATGGACTTTATCCCAGAATGTTTTTTTAT<br>TCGGATTATCCGTCATGATTACGCCCCGCCCT<br>GCCACT  |                                      |
| PBP3-3×Flag-F                 | ATAAAAATGAATTTGTGATTAATCAAGGCGA<br>GGGGACAGGTGGCAGATCGGTTCGACCTGCAG<br>GATTATAA |                                      |
| PBP3-3×Flag-R                 | GTGCTCGCGAAGGTGCGTCTGGCACCCACGG<br>AGCAAGAAGGTTCGCGCAAATTACGCCCCGCC<br>CTGCCACT |                                      |
| DacA( $\Delta$ )-FLAG-F       | GCAATCGGGTAACGATGCTTGTGTCGCCAT                                                  |                                      |
| DacA( $\Delta$ )-FLAG-R       | CTGATGCTTAGTATATGGGGACGGAAATTAC<br>ACTTTCAAGTGTTTAATTTATTCGGGGATCC<br>GTCGACC   |                                      |
| <hr/>                         |                                                                                 |                                      |
| PBP1a-cfm-F                   | GCCTATACCGCTACATCGAGCCACA ACTGC                                                 |                                      |
| PBP1a-cfm-R                   | TAACGCGTTCACGCCGTATCCGGCATAAAC                                                  |                                      |
| PBP1b-cfm-F                   | TTTGAGAGATATCTTCTTCTGTCTTGTAAC                                                  |                                      |
| PBP1b-cfm-R                   | GAAAAGAAAGGGTTAATATCTTAGATGGGA                                                  |                                      |
| PBP2-3×Flag-cfm-F             | TGCGCCAGATCCTCGACCACATTATGCTGG                                                  | Chromosomal<br>3×Flag tag<br>confirm |
| PBP2-3×Flag-cfm-R             | ATCCTGACCGCTGGCGCTCCAGATAACCAG                                                  |                                      |
| PBP3-3×Flag-cfm-F             | TGGGCGGCGTATTGCGTACCATGAACATCG                                                  |                                      |
| PBP3-3×Flag-cfm-R             | TACAAAGAGATCGCCCGCCGACCCACACG                                                   |                                      |
| DacA( $\Delta$ )-3×Flag-cfm-F | GAAAGCCAGCTATGTGCTGA                                                            |                                      |
| DacA( $\Delta$ )-3×Flag-cfm-R | TGATCAACCAGCTCAGGTAA                                                            |                                      |
| <hr/>                         |                                                                                 |                                      |
| pBAD-DacA-F                   | CTAGCAGGAGGAATTCATGAATACCATTTTT<br>TCCGC                                        | pBAD24<br>cloning                    |

|                                      |                                              |                                                         |
|--------------------------------------|----------------------------------------------|---------------------------------------------------------|
| pBAD-DacA-R                          | GCAGGTCGACTCTAGATTTAACCAAACCAGT<br>GATGG     |                                                         |
| pBAD-DacC-F                          | CTAGCAGGAGGAATTCATGACGCAATACTCC<br>TCTC      |                                                         |
| pBAD-DacC-R                          | GCAGGTCGACTCTAGATTAAGAGAACCAGCT<br>GCCG      |                                                         |
| pBAD-DacD-F                          | CTAGCAGGAGGAATTCATGAAACGCCGTCTT<br>ATTATTGC  |                                                         |
| pBAD-DacD-R                          | GCAGGTCGACTCTAGAAGAAAGGTCAGGCCT<br>TATGGTGG  |                                                         |
| pBAD-YfeW-F                          | CTAGCAGGAGGAATTCATGAAACGGACAATG<br>CTCTA     |                                                         |
| pBAD-YfeW-R                          | GCAGGTCGACTCTAGATTACTTCTGCTTTAAC<br>GCCG     |                                                         |
| <hr/>                                |                                              |                                                         |
| pBAD-insert-FRT-Km <sup>r</sup> -F   | GATGATGACGACAAATAGAGATTGCAGCATT<br>ACACGTC   |                                                         |
| pBAD-insert-FRT-Km <sup>r</sup> -R   | CAGCATCACCTCATCGCCATTAATTCCTG                |                                                         |
| pBAD-Flag-FRT-Km <sup>r</sup> -vF    | GTAATGCTGCAATCTCTATTTGTCGTCATCAT<br>CTTTAT   |                                                         |
| pBAD-frt-Km <sup>r</sup> -vR         | ATGGCGATGAGGTGATGCTGCTGCAGGCATG<br>CAAGCTTGG | pBAD-<br>DacA( $\Delta$ C)-<br>Flag-FRT-Km <sup>r</sup> |
| pBAD-insert-DacA( $\Delta$ C)-FLAG-F | AGCAGGAGGAATTCATATGAATACCATTTT<br>TTCCGCTCG  |                                                         |
| pBAD-insert-DacA( $\Delta$ C)-FLAG-R | AGGTCGACTCTAGACTCGAGGTTACCTTCCG<br>GGATTCTT  |                                                         |
| pBAD-vector-DacA( $\Delta$ C)-FLAG-F | CATATGGAATTCCTCCTGCT                         |                                                         |
| pBAD-vector-DacA( $\Delta$ C)-FLAG-R | CTCGAGTCTAGAGTCGACCT                         |                                                         |
| <hr/>                                |                                              |                                                         |
| pET24-DacA-F                         | AAGGAGATATACATATGGATGACCTGAATAT<br>CAAAAC    | pET24- and<br>pET28-                                    |
| pET28-DacA-F                         | CGCGCGGCAGCCATATGGATGACCTGAATAT<br>CAAAAC    |                                                         |

|                         |                                            |                                             |
|-------------------------|--------------------------------------------|---------------------------------------------|
| pET-DacA-R              | GCTCGAATTTCGGATCCTTAACCAAACCAGT<br>ATGGAAC | DacA or<br>DacA( $\Delta$ )<br>cloning      |
| pET-DacA( $\Delta$ )-R  | GCTCGAATTTCGGATCCTTAGTTACCTTCCGGG<br>ATTTT |                                             |
| pRE1-DacA-F             | GGAAATACTTACATATGAATACCATTTTTTCC<br>GCTCG  |                                             |
| pRE1-DacA-R             | GTCGACGATATCTAGATTAACCAAACCAGT<br>ATGGAAC  | pRE1-DacA<br>or DacA( $\Delta$ )<br>cloning |
| pRE1-DacA( $\Delta$ )-R | GTCGACGATATCTAGATTAGTTACCTTCCGG<br>GATTTT  |                                             |
| DacA(S73G)-F            | CCGCCGCGATCCTGCCGGCCTGACCAAAT              |                                             |
| DacA(S73G)-R            | ATTTTGGTCAGGCCGGCAGGATCGCGCGG              | Point mutant                                |
| DacA(K242R)-F           | TGTCGACGGCATCAGAACCGGACACACTGA             |                                             |
| DacA(K242R)-R           | TCAGTGTGTCCGGTTCTGATGCCGTCGACA             |                                             |



## References

- Blattner FR, Plunkett G, 3rd, Bloch CA, Perna NT, Burland V, Riley M, Collado-Vides J, Glasner JD, Rode CK, Mayhew GF, Gregor J, Davis NW, Kirkpatrick HA, Goeden MA, Rose DJ, Mau B, Shao Y. 1997. The complete genome sequence of *Escherichia coli* K-12. *Science*. **277**:1453-1462. doi: <https://doi.org/>
- Choi U, Lee CR. 2019. Distinct roles of outer membrane porins in antibiotic resistance and membrane integrity in *Escherichia coli*. *Frontiers in Microbiology*. **10**:953. doi: <https://doi.org/10.3389/fmicb.2019.00953>
- Datsenko KA, Wanner BL. 2000. One-step inactivation of chromosomal genes in *Escherichia coli* K-12 using PCR products. *PNAS*. **97**:6640-6645. doi: <https://doi.org/10.1073/pnas.120163297>
- Ji CJ, Yang YM, Kim JH, Ryu SH, Youn H, Lee JW. 2018. The roles of two O-donor ligands in the Fe<sup>2+</sup>-binding and H<sub>2</sub>O<sub>2</sub>-sensing by the Fe<sup>2+</sup>-dependent H<sub>2</sub>O<sub>2</sub> sensor PerR. *Biochemical and Biophysical Research Communications*. **501**:458-464. doi: <https://doi.org/10.1016/j.bbrc.2018.05.012>
- Park SH, Kim YJ, Lee HB, Seok YJ, Lee CR. 2020. Genetic evidence for distinct functions of peptidoglycan endopeptidases in *Escherichia coli*. *Frontiers in Microbiology*. **11**:565767. doi: <https://doi.org/10.3389/fmicb.2020.565767>
- Reddy P, Peterkofsky A, McKenney K. 1989. Hyperexpression and purification of *Escherichia coli* adenylate cyclase using a vector designed for expression of lethal gene products. *Nucleic Acids Research*. **17**:10473-10488. doi: <https://doi.org/10.1093/nar/17.24.10473>
